# Supplementary material for: A flavin-dependent halogenase from metagenomic analysis prefers bromination over chlorination
Source: PubMed Central journal article supplement (PMC5945002; doi:10.1371/journal.pone.0196797), 2018-05-10
Supplement: pone.0196797.s015.pdf [file pone.0196797.s015.pdf]

S1 Table.

|                                        |                                              |
|----------------------------------------|----------------------------------------------|
| <b>Space group</b>                     | C2                                           |
| <b>Unit-cell parameters (Å, °)</b>     | 180.62, 88.35, 70.11, 90.000, 99.075, 90.000 |
| <b>Data-collection statistics</b>      |                                              |
| Wavelength (Å)                         | 0.96770                                      |
| Energy (eV)                            | 12,812                                       |
| Resolution range (Å)                   | 49.32-2.5 (2.56-2.5)                         |
| No. of reflections                     | 408829 (30741)                               |
| No. of unique reflections              | 36507 (2688)                                 |
| Completeness (%)                       | 96.5 (98.0)                                  |
| R <sub>meas</sub>                      | 0.202 (1.422)                                |
| Redundancy                             | 11.4 (11.2)                                  |
| Mean I/σ(I)                            | 11.89 (1.84)                                 |
| CC <sub>1/2</sub>                      | 99.6* (66.1*)                                |
| <b>Refinement and model statistics</b> |                                              |
| No. of reflections (working / test)    | 34697 / 1809                                 |
| R <sub>cryst</sub>                     | 0.19456                                      |
| R <sub>free</sub>                      | 0.24072                                      |
| r.m.s.d. bonds (Å)                     | 0.0128                                       |
| r.m.s.d. angles (°)                    | 1.5723                                       |
| B factor (Å): Wilson / average         | 34.1 / 39.88                                 |
| No. of non-hydrogen protein atoms      | 7732                                         |
| No. of waters                          | 315                                          |
| <b>Ramachandran plot by MOLPROBITY</b> |                                              |
| Favoured region                        | 95.79 %                                      |
| Allowed region                         | 4.00 %                                       |
| PDB code                               | 6FRL                                         |
