# Supplementary material for: A flavin-dependent halogenase from metagenomic analysis prefers bromination over chlorination
Source: PubMed Central journal article supplement (PMC5945002; doi:10.1371/journal.pone.0196797), 2018-05-10
Supplement: pone.0196797.s016.pdf [file pone.0196797.s016.pdf]

S2 Table.

| Metagenome                      | Project ID<br>Gold ID                | Collection Site                                                                     | Habitat                                                                         | File Size | Temperatur    | Total hits | Complete genes |
|---------------------------------|--------------------------------------|-------------------------------------------------------------------------------------|---------------------------------------------------------------------------------|-----------|---------------|------------|----------------|
| Kaneohe Bay                     | CAM_SMPL_000824<br>(www.imicrobe.us) | Kaneohe, Hawaii                                                                     | Marine Sediment                                                                 | 40 Mbases | 25°C          | 1          | -              |
| Botany Bay                      | CAM_SMPL_001699<br>(www.imicrobe.us) | Sydney, Australia                                                                   | Marine Sediment                                                                 | 91 Mbases | 25°C          | 42         | 42             |
| Enigmatic life underneath       | Gp0057578<br>(gold.jgi.doe.gov)      | Juan de Fuca Ridge flank, Pacific ocean                                             | Deep oceanic basalt-basalt hosted subsurface hydrothermal fluids, CORK Borehole | 20 Gbases | Not specified | 1          | 1              |
| Perpetual spouter A (PS_A)MetaG | Gp0093345<br>(gold.jgi.doe.gov)      | Yellowstone Nationalpark, Wyoming, USA                                              | Perpetual spouter, thermal spring                                               | 16 Gbases | Not specified | 0          | -              |
| Mammoth Hot Spring              | Gp0054656<br>(gold.jgi.doe.gov)      | Mammoth Hot Spring (Liberty Cap Streamers), Yellowstone National Park, Wyoming, USA | Environmental, Hot spring cone                                                  | 6 Gbases  | Not specified | 0          |                |
| Tshipise hot spring metaG       | Gp0138775<br>(gold.jgi.doe.gov)      | Tshipise, Limpopo, South Africa                                                     | Hot spring microbial communities from South Africa                              | 17 Gbases | 42-90°C       | 0          |                |

|                                                                                |                                 |                                      |                                                                   |           |               |     |    |
|--------------------------------------------------------------------------------|---------------------------------|--------------------------------------|-------------------------------------------------------------------|-----------|---------------|-----|----|
| Sagole Hot spring metaG                                                        | Gp0138776<br>(gold.jgi.doe.gov) | Sagole Baobab, Limpopo, South Africa | Hot springs metagenome                                            | 14 Gbases | 45°C          | 42  | 18 |
| AOA Metagenome C0912_C49A8_80                                                  | Gp0056852<br>(gold.jgi.doe.gov) | Monterey Bay, California, USA        | Marine metagenome, ammonia-oxidizing marine microbial communities | 5 Gbases  | Not specified | 0   |    |
| Genome sequencing of two Panamanian Oscillatoria strains for drug discovery    | Gp0054795<br>(gold.jgi.doe.gov) | Panama canal                         | Marine cyanobacterial communities from Panama                     | 28 Gbases | Not specified | 18  | 0  |
| Metagenomic sequencing of an uncultivated bacterial phylum in marine sediments | Gp0112845<br>(gold.jgi.doe.gov) | Atlantic Ocean:Atlantic Coast        | marine sediment metagenome                                        | 26 Gbases | Not specified | 150 | 16 |
