# Supplementary material for: A flavin-dependent halogenase from metagenomic analysis prefers bromination over chlorination
Source: PubMed Central journal article supplement (PMC5945002; doi:10.1371/journal.pone.0196797), 2018-05-10
Supplement: pone.0196797.s017.pdf [file pone.0196797.s017.pdf]

S3 Table.

| Predicted gene | Amino acid sequence                                                                                                                                                                                                                                                                                                                                                                                                                                                                                                                                                            |
|----------------|--------------------------------------------------------------------------------------------------------------------------------------------------------------------------------------------------------------------------------------------------------------------------------------------------------------------------------------------------------------------------------------------------------------------------------------------------------------------------------------------------------------------------------------------------------------------------------|
| 1              | MAEEAYAPLKSIVIVGGGSAGWMTAAALS DAVGKSCSITLIESE AIGTVGVG<br>EATIPPIRQFNARIGIDEATFVKETAGSYKLG IQFVDWSRK GHSYFHPFGQY<br>GAEDKVPFYHYWMREALDGR IAGPIDEF SMCWAMAKAGK FARPEPDRRK<br>IQSTFDYAYHFDAGLYAAFLRRVSEARGVKRIEGRVTDVIQRGEDGFIESVT<br>LDKGT SVSGELFIDCSGFRGL LIEDTLKAGYENWQH WLP CDRAVAVPCA KQ<br>AEITPYTRSTAKEAGWQWR IPLQHRTGNGYVHCSEFISEDEATETLMGSLD<br>GEAQADPRTLRFVTGRRKKFW DKNCVAIGLSAGFMEPLESTSLHLIQYGILR<br>LIALLPDSEMSPLLAREYNRQT ADEYARIRDFLILHYKATTRDDAELWRYCSA<br>MDIPESLQYKIDHFRNYGLLV ADERELFANPSWIAVYMGQDIMPRRAPAITE<br>MRDGPVPAQRMQMISQAMREAVAQMPTHADFLARHCPSPLAS |
| 2              | MSNTNVQKLVIVGGGTAGWITAAAFSRLMGR TLSIELVESDAIGTVGVGEAT<br>IPQIIRLNRLGLDEHDFVKRTNGTFKLGIEFVDWGDVGTRYLHTFGDAGMNL<br>ASVPFHHYWKRAEASGSRHSLWHYSLHQLA ANHAKFGKLD RLVGNTSMTG<br>LAYAYHFDASLYAAYLRAFSEQKGVTRTEGIVQSVARDGESGDITSITLDNG<br>REIAGDFFIDCTGFRALLGQELGVGYQDWSK WLP CDSAQAVPSE RLETLV<br>PFTRATAKTAGWQWR IPLQHRTGNGHVYCSDFISDEEAGETLLAGLDTKPL<br>ADPRPIRFTTGRREQFWSNNCAAIGLSSGFLEPLESTSIHLIQSHVSRLLQLF<br>PASNRSDVERAEYNRRCEAEFEQIRDFLILHYHQT NREDSEFWRYCRNMD<br>VPDSLTHKQELFASSGRVGRDADDFREASWVQVM LGQGVTPQSHDAMA<br>NGLSDAQLSEFLGNVRTLIERAVGTLPTHEQY LKQNCAAAEAA            |
| 3              | MAIQHIVIVGGGTAGWMAAAALSRLKSGRTLDITLIESEQIGTVGVGEATIPP<br>FVGFNDLLGIPESSELLSNVQGT FKLGIQFENW GKRGD SYIHPFGAYGYTMG<br>GISFHHVWHKLAKEGDNRP IQVFNVTMAAYFGKFM RSEDYQKQRDDL PPI<br>NYAYHLDAGKYAAFLRGYAEKRGVVRQEGRVDDVSLDGETGFVTGVTLDD<br>GRKIDGDLFIDCSGFRGLLIEQALGTGYEDWTH WLP CNRAVALPCGRDDGS<br>PPPPFTRATAHSAGWQWQVPLQHRNGNGHVYCS EFMEDQEALDILLGNIA<br>GKPQADPNFLRFTTGRRKKFWNKNVVALGLSAGFMEPLESTSIHLINTGVD<br>KLLSLLSLDGVTQTQEDTFNRLTGREYARIRDFLILHYNATSRDDSGFWNYV<br>RTMDVPETLTEKVELFKANGQIFREEDELFTETS WAAVMMGQGIAMTGHNA<br>MADSLDPASTRKEIDEMEQSIRFLIQHMPGHGEYLSRYCPAKAA         |
| 4              | MTQP SLPRRIVVAGGGTAGWMTAAALARTLGPVAQVTLIESEQIGTIGVGES<br>TIPPLVAYNRILGIDEADFM RATQATFKLGIQFENWRVPGESYFHSFGGTGK<br>DHWSAGFQHFWMHGAAQGH DAPYDEYCLELKAAMAGRF AHLPPDRMNY<br>AYHLD SGLYAKFLRAMAEGDGATRIEGRIVAVDL DGASGDIAALRLDGD RRI<br>EGDLFIDCTGFRALLIEGALHAGYDDWTHWLP CDGAVAVQTASVRAPV PYT<br>RAIAHDAGWQWR IPLQHRQNGIVYCSAFMEPQAAQDQLLATVEGDRLVQ<br>PNPIRFRTGARRRQWHRNCVAVGLSGGFMEPLESTSIHLIQRAVLRILRMLP<br>AGAISPRDIAEFNDQQMADMEQIRDFLILHYKATDRR DTPFWRHCASMSVP<br>DSLTHKMELFRETGRVFRKNEELFAENSWVQVM MGQGITPQSYHPVA AKL<br>RPQELKHLALTALRDQVSRTVSALPDHGAYVARYCGAQDVAAA          |
| 5              | MVRPVRNIVIVGGGTAGWLTAGVIAARHRTRIGQDLSVTLVESPNTPIIGVGE<br>GTWPTLR TTLSRMGISETDLFRQCDAAFKQGAWFARWTDGTASDGYHPL<br>MLPQNFQVNLVPHWLARDGDESFCDAVCAQGRICDDGLAPKTMATAEY<br>DALANYAYHLDAGKFAPFLQRHCCEKLGVRHVLADVEQVVLHDDGDIAAVR<br>TTQAGLVEGDLFVDCTGFKALLIEGAMGV PFRDCNDVLFCDTALAMQVPYA<br>APDSPIASHTISTAQSAGWIWDIGIQTRRGVGHVFSSSHISDEQAERELRAY<br>VGPASDGLNVRKIKIRSGHRETFWKGNCVAVGLAAGFLEPLEASAVLIELSA<br>KIIAEQMPACREVMDIIASRINATTHYRWGRIIDFLKLHYVLTQRTDSDFWRD<br>NVRAETMPDRLRELLHLWRYQSPWFHDEFDRAEEVFPAASYQV VLYGMG<br>FRTQVPTAALARDAHLAGRAMRENAATARLRAGLPRHRDLIDRIVAQGLQ<br>PV      |

|    |                                                                                                                                                                                                                                                                                                                                                                                                                                                                                                                                                                                                                |
|----|----------------------------------------------------------------------------------------------------------------------------------------------------------------------------------------------------------------------------------------------------------------------------------------------------------------------------------------------------------------------------------------------------------------------------------------------------------------------------------------------------------------------------------------------------------------------------------------------------------------|
| 6  | <p>MTKTNVKNVVIAGGGTAGWMAAAALAKLIGKNIHVTLVESDDIGTVGVGEA<br/> TIPPIRTFHKLLGINEQAFMKATQASFKLGISFENWGDENTRYIHSFGVTGKE<br/> CWAGEFHFWLQGGKVLGINNPFQDYCYELQAAKAGKFAFNQQNPINYAYH<br/> MDATRYAQFLREFSEPLGVKRVEGKIQKVKS AKTGHIESLLLHSGEQINGD<br/> FFIDCTGFRGLLIEQALHTGYEDWSHLLPCNSAIAVQTKSTS DTVLP LTRSIA<br/> HKSGWQWRIPLQNRVGNGLVYCSQYMDDEQAKALLN NIEGEALTEPRVIK<br/> FKTGRRLKGWNKNCLALGLASGFVEPLESTSIHLIVSGIIRFMRLFPFNGITN<br/> YAIDEYNKQLKSEIENIRDFIVLHYKVTNRDDSEFWQHCSAMEVPTTLQHKID<br/> LFKQTGRVFLDDGDIFRVD SWVQVMLGQGIVPEQHHLIASMMSDEELARFL<br/> HGIIKQIEQRVSQLPPHHEFLKHYCPA</p>                                 |
| 7  | <p>MNKAVKTVAVIGGGTAGWLSAALIASYHQSQNGDGLKVMLVESSDIPTIGV<br/> GEGTWPTMKNTLQQIGLREVDVFKTCNATFKQGGK FVNWTHGNDFYH<br/> PFTVPLGYGRIDLAPYLDNVVDYAQQTNFQHDICEASLAPRGIAQGEYQGN<br/> CNYAYHLDAGAF AEMLKQHSKSKLGV EHVIGTVDEVKLDNDGAIDTTLTKD<br/> QTRTINADLYVDCTGFSSLLL GQALNIPFKKMDHVLFNDSALAMQVPYAEGD<br/> ESLASHIATAQNA GWIWDIGLTHRRGVGHVYSSKFLSDDEAEQNL RNYLG<br/> DAAEGLTARKISFESGYREKFWHKNCVAVGMSAGFVEPLEATAIMLVEISS<br/> RFVAEHMPADTKVMPIVAKRFNEQMDYRWQRIIDFLKLHYMLTKRPEPYWQ<br/> AHVDPDTIPQSLKDDLLLWESRGLIQDFHGALELFP AASYQYVLYGMGFK<br/> PDFTKQAYLYSQDAQAKQIIERNSQLTQQMLQTLPPH RAYIEQWLANPV</p>                   |
| 8  | <p>MNQQNKKIKAVVVVGGGIAGWLTAGRLAAHHSNTPDGLNVV LVE SPNVPII<br/> GVGEGTWPTMRSTLIALG ISETDFIRECEASFKQGA KFAKWVDGSEDDFY<br/> HPLVLPQGF SKTDMAGHWLNNTAESTSFSNAVCYQE AICEQGLAPKTIRTP<br/> EYAAIAN YAYHLD SAKFAVFLQKHCTQQLGVKHILADV TQVNSADNGDIASVI<br/> TKQQGEISGDLFVDCTGFSSLLLGEHYKVPF MPCDDVLFIDTALAVQVPYEN<br/> DDENIASHTISTAQEAGWIWDIGLQHRRGVGYVYSSKYSSE AQAREKLKAY<br/> VGDKIESLTIRKIPIKSGHRSHFWQNNCVAVGLSAGFLEPLEASALV L VEMSA<br/> QMISEQLPQTRDIMDITAKRFNETFTYRWEKIIDFLKLHYILSTRDDNAFWRD<br/> NRDPKTIPQSLQDLMKLWQYRAPADHDFTSNNEVFPAASYQYVLYGMGFK<br/> SDYSTTTYMLKDTVFAKSQFDKNKSMINQAVTNLPSNRELLNKIKHHGFSAI</p> |
| 9  | <p>MTKPIKKIVILGGGTAGWLSAGLLAAEHPHLSVTLIESANVPILGVGEGTWPS<br/> MRNTLQRIGIKEIDFITQCDATFKQGSKF INWCNLSKGENYYHPFMDPQGYE<br/> QTNLHANWQRIAPNQKFADVVMQSFVCQAALAPKQLQTPEYAAVTNYGY<br/> HLDAGKFAEFLKNHCVKHLNVTHNTDDVTHVINDEHGYIASLKTNKNGDITG<br/> DLFLDCSGSRARLIGEHFNSEFIAQDHILFNNSAVAAQVPNAHINQPIASATL<br/> STAQSNGWIWDIALPTRRGTYV FSSKYQSGESATDTLKS YIAKSTSEQQA<br/> EQLNYRVLKFSPGYRQKFWIKNCVAVGMSAGFLEPLEASALAMVELSISML<br/> SEQLPQN RTHMSQLANRFNDRFSTRWQRVVEFLKLHYVLSERDDTPYWQ<br/> NIRDLT TAPEHLQNL LKLWQFQPPSRDFIENEEVFSSSSYQYILYGMGFNT<br/> QTPQAHN AFTSAQAGDYFYQQNREKIAQYLKSLPSNRALLNDLLSNNRQPH<br/> ND</p>    |
| 10 | <p>MKPIKNVVIAGGGTAGWIAAALLNKVLGKVINITLIESSIGTIGVGEATIPPIIQ<br/> LNNALGINEQDFINATNASIKLGIEFENWKTPSHSYMHA FGSFGKDFPFCD<br/> YNFWVVKGQISGSEDSLWDFSLNYQAAKHKHFAPLSAIPNTQLPGISYAFHFD<br/> ATLYAEYLKKLAVSRGVKHIDAKIERVTQCPNTGQINSLTLDNNSQIEGDLFI<br/> DCTGQRALLIEQTLNTGFVDW SHYLP CDSAVAVQSTGSDEL RPYTR SIAHN<br/> AGWQWQIPLQNR TGNGLVYCSRYLSDEGATALLN NLPGEPTTDPRLIKFK<br/> TGRRLKQWHKNVAVGLSSGFLEPLESTSIHLIQSAVIRLIKLFPHNGISDALV<br/> TEFNKQSVTEIEHIRDFIILHYKLTEREDSPFWRQCKQMDIPQSLAHKIDLFR<br/> QTGKVVRENDELFAEVAWQQVCIGQGLIPEDYNNIVESLSSEQLNDFSTLK<br/> TLITSTVDQLPTHKDFLAKIKKA</p>                              |
| 11 | <p>MTAAALARLVAPSGVQITLVESEAIGTVGVGESTLPHIRAFNERLGIDEA AFM<br/> KATRATFKLGIQFENWGQIGGSYIHPFGDYGAPGGEAPFH HYWLRGRELG<br/> DVGPIDDYSLPVVAAREGRFAPPSDDPRSLLSTYRYAYQFDATLYARFLRG<br/> MAETEGVRRIEGRIQNVAQDGESGAIKVTLDDGRQIEGDLFVDCSGFRALL<br/> IEQTLKAGFTDWSHWLPCDRAVALPCESDQPTVPYTRATALEAGWQFRIPL</p>                                                                                                                                                                                                                                                                                                              |

|         |                                                                                                                                                                                                                                                                                                                                                                                                                                                                                                                                                                         |
|---------|-------------------------------------------------------------------------------------------------------------------------------------------------------------------------------------------------------------------------------------------------------------------------------------------------------------------------------------------------------------------------------------------------------------------------------------------------------------------------------------------------------------------------------------------------------------------------|
|         | QHRVGNQYVYSSAFIDDAALDRLVGRLEGKPLKAPNVLKFTAGQRTNRW<br>AANCVSVGLSSGFIEPLESTSIYLIQIAITKLIELWPTAVIDPATEAEFNRQM<br>DLEYIRIRDFIILHYCATARNDTPFWDYVRTMPLPDTLSEKIELFRARGVVQD<br>YREGLFLHPSWVAVYLGQDILPRRHPLVDAVSATQLMSSLERLRRMVREA<br>SYKLPSQDDYIARYCAHLPL                                                                                                                                                                                                                                                                                                                       |
| 12/brvH | MDEIDDPRIIRSVVIVGGGTAGWMTAAALVQHFRAPLKITVVESSDIGTIGVG<br>EATIPTIRRFYQQLGLRDDDVMRATQATCKLGRFLDWSGPGSDFIHPFGLY<br>GQDVKGIGFHYYWLKQRRAGDAAPLAAYSLSGAALAAGGKFTLPSPHPPSQ<br>LSVFDWALHLDAGLFAQHLRAYAEAGGCARIDARIRSVELRPEDGFVRALTL<br>DDGREVEGDLFVDCSGFKGLVIGEALGVGFEDWGRWLPCDAAYAVQSEN<br>RPGDAPAPFTRVTARSAGWQWGIPLRHRAGNGLVFSSAHLSDQALAEML<br>PHLLGDPLTEPRRIPFRPGRRSQAWAKNCVAIGLSSGFLEPLESTSIALIETG<br>IERLKALFPDRRFAQPILDEFNDQTAREMVRDFIILHYKLNRRDTRDFWR<br>DCREMPVPETLERKIALWTARGQFVRYRWEMFHPASWLAIDGFGLYPDH<br>HDPAVDAMDPAYLARSLAEMRANIADLVARTPEHAQFLAGLDPAAASAA          |
| 13      | MDQPRRPLKKICIVGGGTAGWVAAALMAEHFKGRMAEIELVESDDIGTIGV<br>GESTVPPFLEMLKRLGIDERDFIQKTQASFKLGIQFEDWTQKGESYFHPFGA<br>VGVPVDISDFYPVWLKARMNGYDRPLMDFAAAARMASQGRFMLPFKAQRT<br>PIGGASYAVHVDKRVARYLRDFAEARGVKRTEGIVEDVMTRPDGFVSGLK<br>LKSGQTVADFFIDCTGFRALLIGKTLGVGYTDWSEWLMCDRAIAVQTENV<br>GPPTYTLAQACQCGWRWRIPLQHRTGNGHVFCSTRYMSDDEATARLLAQ<br>VEGRPVVNPMPVVPFKTGVRKIWDKNVLSLGLASGFIEPLESTAIHLIYRGM<br>DFLFRMLPDLDCDPNLAAEYNRRMTVDYEEIRDFIILHYALTRRDDTAFWRQ<br>CRDMVLPEGLQHKLEVFRANGSLVEALDPLFRNVSWYAVMDGMGVRPRS<br>YPPLVDRIDSTGLTDEMRAANILNAFVADLPTHQAFIDTHCPAPSVDLPAVL<br>AVPA |
| 14      | MGADVRQLKTILIVGGGSAGWMAAALFSKLFKGLYDITLIESEAIGTIGVGEA<br>TIPAIKTFNELIGLDENDFMRRTQASFKLGIQFVDWDRVGSSYIHGFGVIGRD<br>LKWLRCHQYWLKMRAEGKVSDLAAYSINTAAALQNRFRADPKRPGSPLG<br>HIAHAFHFDAGLYAKYLRGMSEAAAGVRRREGKVVSQVLRPEDGFVDSVTLE<br>DGAVVSADLFIDCSGFRGLIEQAMKTGYEDWSHWLPCDRAMAVPCARTEP<br>FTPYTRSTARPAGWQWRIPLQHRTGNGHVYSSRHMDGGEAEQILLSNLDG<br>AQMAEPNRIRFVAGKRRQIWNRCVAAGLASGFLEPLESTSLHLIQSVLIRL<br>VRLMPDAGFDPATIAEFNRQTDFEYERIRDFIILHYKATERDDTPFWRYCRD<br>MDVPVTLERKIDLFRANGRIFREDELFAEESWIQVLLGQGIIPVGYDPLVDV<br>TPEPDIERYLADVETVIGKCVAMPESHADYVAKACPA                 |
| 15      | MAAAALSKLIGKQLDIALVESDDIPTVGVGEATIPTILTINRLLQIPEPEFLQAT<br>QGTFKLGIEFENWRKQGHRYIHSFGDTGQGCWAAGFHHFWLKGMEQGIS<br>SDYGEYCPELKAEEQSKFAIQSQKLNAYHLDAGLYGRFLRKIAEQHGVR<br>RIEGKISDVQCNTDDGYIQLRLESGQVVEGDLFIDCTGFRALLIEQALES GF<br>DDWSHWLPCDSALAVQTESVGEAVPYTRSIARCSGWQWRIPLQHRVGNQ<br>FVYSSKYLSDDKAEQILLDNVEGAPITKPRPIKFRGTQRKQYWNKNICIALGL<br>SSGFIEPLESTSIHLIQNGIMWLLLMPFPQGITKSVVNEYNEKLRREADCIR<br>DFIILHYHVTERDDTDFWNYCREMSIPDSLQHRIDLFRETGRVFKPQDDVFA<br>ENSWVQVMMGQGITPEQYHPIVDMMSDVELKSFLQTIENNAKSLVSQLPSH<br>ADFVAHYCKAVG                                         |
| 16      | MVNRIEKVVVGGGSAGWLTAATLAAEFKSGPGGISVTLIESAETKSIGVGE<br>GTWPSMRTTLQKIGISETEFFRECDASFKQGSKFTSWLDGGNESYHPFSL<br>PEGYQEINLADFWAPHRDKVSFANAVCPQLRVCESHKAPKQISAPDYAGSL<br>NYGYHLDAIKFARLLRKHAVEKLGVTVIDHVEKIHSAPNGDIASLQGKAHG<br>QINGDLFIDCTGFASLLIGRHYSIPLIGKDVLFNDRAIAVQVPYADESAPIAS<br>ATLSTARSAGWIWDIGLPSRRGTGYVFSSKYIDEQQAVDELKAYVGNISAGIP<br>FEELAPRTIDINPGYRQKFWHKNCVAIGLSAGFVEPLEASALVLIELSARMI<br>AEQMPADRQVMDIVAEEKFNDKFATRWWQIIGFLKLHYVLSRRNDSQYWLD<br>NRSAESIPSDLAAQLKLWRTRSPWYCDETHVDQMFPASQYVLYGMEYP                                                            |

|    |                                                                                                                                                                                                                                                                                                                                                                                                                                                                                                                                                                                                                                          |
|----|------------------------------------------------------------------------------------------------------------------------------------------------------------------------------------------------------------------------------------------------------------------------------------------------------------------------------------------------------------------------------------------------------------------------------------------------------------------------------------------------------------------------------------------------------------------------------------------------------------------------------------------|
|    | SQPM TARKRSGDS DQQRARQIFASND SMAGKLLTNLPTNRDLTDQVKHQG<br>FGHI                                                                                                                                                                                                                                                                                                                                                                                                                                                                                                                                                                            |
| 17 | MLGGGSSGYFAALAIQRRFPELEVTVIASSKVPIIGVGEATTTLMPPFLHAQL<br>GLSMEAMCRAVEPTFKLGIRFEWGRPGAYHFNFPFGDADPLLAHHFDGDL<br>RHQSLMSMAMDQGLAPVLRGPEGEVVSLLRQVKFAYHLDNAPFVAFLAEA<br>ARAAGIGHIDATICDASTRAGASGEPEIASLR TEDGRELAYDLYIDASGFRSV<br>LLGGALEERFQSYASSLFC DRAVVADVAEGAGVEPYTTAETMDAGWCWRI<br>PVRRACHRGYVYSSAFQSDDEAVAHMRAANPSMGEAKLIRFRSGRRERA<br>WVGNVA AVGNAYGFVEPPRVHGPAGHRRARLRARGDRGPASRGRGRG<br>RGADLPRVRQRVPGRALGLPALVSGGALQVQPAPGQRLLAGRPGRGRRL<br>GPRAGDRALSEP GAVAGRGRPLRRGRSSLRLQRADDHAARPARREPGR<br>CGAQNQAEPGPVARADRASAH PALRRGSAHGLGLARGPPRAPARVRGA<br>PQLVVPGRRRRAGRGRDRGSAAGTAQERHARGASRLAASGWGLARGPRP<br>DPRMGERLTRA           |
| 18 | MRMAIEHIVIVGGGTAGWMAAAAALSRI RDGRDLKITLVESEQIGTVGVGEATI<br>PPFVEFQNALDIDEREMMAAVQGT FKLGIQFANWGQVGESYIHPFGDYGYE<br>LGGVHFHQVWHAMRERGD KRPLQVFNLETMAAHFGKFMRSQDYGRDDL<br>PMNYAYHIDATAYARFLRAYAEKRGVVRREGLVKNVALHPETGFVTGITLDD<br>GEEIEGDFFDVDCSGFRGLLIEQALETGYEEWTRFLPCDRAVALPCNRDDGS<br>PPPPFTKATAHKAGWQWQVPLQTRNGNGHVYCSEFMEADEAH DILVQNLA<br>GKPTADPNHLRFVTGRRKKFWNKNVVALGLASGFMEPLESTSIHLINTGVN<br>KLIATLSLDGVTEAQASTYNRLTDKEYERIRDFLVLHYKVTRRDDSEFWNYV<br>RTMDVPDTLSEKIEIFKANGQVFREDELFTTTSWAAVMLGQGITMDGTSP<br>MAAGVIDGVAKEVDEMERSIKWL VQQMPGHDQYLQRYCPTGVKAA                                                                       |
| 19 | MQDPHNKPIKRVVIAGGGTAGWLAASLMKKVLGKAVIDITLVESEAIGTVGVG<br>EATIPPIRLVNQVLGIDEAQFLHDTKATIKLAIRFENWTKKGESYYHTFGAPG<br>KSMAFCHFHHYVVKARQQGLKADLWDFDLNYHAAEAGRFAQINAKDPVVE<br>LPFAYHFDA SLYAQYLRKLS ENMGVVRKEGKISRVRQRTD SGFIQALHLESG<br>DVVEGDLFVDCTGFKGLLIEEALGAGYDDWSHLLPCDSAI AVPSEHEKTA<br>PYTRSI AH DAGWQWRIPLQHRNGNGHVYSSRYISDDQACDTLLSNLDTKPL<br>GDPKLIKFTTGRRRKQWYKNVAVGLSSGFLEPLESTSIHLIQSAIVRLIQ LFP<br>HNGFAPSLESEYNKQSELEFEQIRDFLVLHYTVNERTDSAFFNDMRNITLPD<br>SLAHKIALFKESGNLLREQNDLFLESSWLQVLYGQGITPKDYHGLVNSVPEV<br>QLNQMLTRLLEIKKEPIAKLPTHDEYINGMVAKYKRAMS                                                                     |
| 20 | MNNRLRKITIVGGGTAGWMTALILETELSRTSAPKDRPKICLIESPNIATVGV<br>GEATVPRMPKTLRQAGISERAFFRETNASFKLGVKFCNWNKDANGNRIDYV<br>NPF AHGQLLDGLEPAEYFLRFGNGDRDYTQSIAPHDDLGR LCKGARPLGQ<br>PEFEQRF GYAYHLD AVKFAGMLTKVCTKHGVEHIQDEVTSVELDEQGNVS<br>HLMLEQRGRHDIE MVIDCTGFRGLIINQALGEPFMDYSDYLPNDRAMALQID<br>HPDPEKIESL TRSTALGAGWTWRVPLYNRVGTGYVFSSAHR TDDQA ADEY<br>LEWLGD SGKGATPRVIPMRIGRVRNAWVKNCVAIGLAGGFIEPLESTAIHM<br>IDHAVRWL TEHMPTRDIAPSLRTRYNRQMDKLYDEVLEFICLHYRLGNRTD<br>DQYWIDARTEMKIPDRLAENLELWQHRLPMPHDIEFATLFDYRVYQTVLLG<br>KQVYDTGYGPGIRDRLRPLKKPIWFQWWKGAKVDLANILKSMPDHKTLLRD<br>IRGELDQPGFGMGAAMKPTVSMPCPEAVPCMIQNMP SFSEIENGQKDLQL<br>F |
| 21 | MDNRLKKITIVGGGTAGWMTALILETEFARTSAAKDRPKICLIESPNIATVGV<br>GEATVPRMPKTLRQAGISERAFFRETNASFKLGVKFCNWNKDAKGNRIDYV<br>NPF AHGQLLEGLEAAEYFLRFGNGDRDFTQSIAPHDDLGR LCKGARPLGQP<br>EFEQRFGYAYHLD AVKFAGMLTKVCTKQGV EHIRDEVTSVELDEHGNVSHL<br>MLEKRGRHDIE MVIDCTGFRGLIINKALGEPFLDYSEYLPNDRAMALQIEHPD<br>PEKIESL TRSTALGAGWTWRVPLYNRVGTGYVFSSAHR TDDQA ADEYLEW<br>LGDSGKGATPRVIPMRIGRVRNAWVKNC LAIGLAGGFIEPLESTAIHMID<br>HAVRWFAEHLPTKEIAPSLRSRYNRQMDKLYNEVLEFICLHYRLGNRTDDQ<br>YWIDARTEMKVPDRLAENLELWQHRLPMPHDIEFATLFDYRVYQTVLLGKQ                                                                                                                   |

|    |                                                                                                                                                                                                                                                                                                                                                                                                                                                                                                                                                                                |
|----|--------------------------------------------------------------------------------------------------------------------------------------------------------------------------------------------------------------------------------------------------------------------------------------------------------------------------------------------------------------------------------------------------------------------------------------------------------------------------------------------------------------------------------------------------------------------------------|
|    | VYDTGYGAGIRDRLRPLKKPIWFQWWKGAKMDLAQILKAMPDHKTLRLDIR<br>GELDQSGFGIAAAMKPTVSMPGEAMAPFAVQNMPSHTEIQTGSKDLQLF                                                                                                                                                                                                                                                                                                                                                                                                                                                                       |
| 22 | MMKVVIAGGGTAGWMAACGLSSRLASLLDITLIESDEIGTVGVGEATIPPMR<br>NFHRLMGIDEQEFMRETQATFKLGIEDFNWGNIGDSYIHSFGEIGQRSWMA<br>EFHEFWMEAQAQGGFSSLEDYCLELKAAGKGFATAIGDTRLNFAHLDAT<br>RYAKYLRKKSEKAGVRRVEGLIEDVQKDPQSSEIKALLKSGELIEGDLFIDC<br>TGFRSLLLGESLGVFDDWSHWLFSRAIAVQTESIDEPVYPYTRATAHPSG<br>WQWRIPLQSRVGNIVYSSRFMSDDEAKQTLNINISGKMITEPRHIKYRTG<br>RRQKSWHKNCVALGLASGFIEPLESTSIHLVMTAIIRLIRLFPFGDSSTALAD<br>RFNQESTTEIETVRDFVILHYKQTNRTDTDFWNAYRTMDIPDTLAHRLDIFKN<br>NGYVWVDDVALFRVDSWVQVMMGQGLTPSGFHSAGKLTGSEGLQQSLAK<br>LKTSIDEKVAKLPTHQQFIDHYCAAPKAD                                   |
| 23 | MTKTVVIVGGGSAGWLTAGIIAARHNPLGEAGQGTKVILLESVDVANLGVGE<br>GTWPTMRDTRLRIGISEGDFLRACDVGFKQGSQFINWQRGEGESYYHPFV<br>PPAGYGSVNLAAHWLDKAVDSTFADAVSPQGVCDLGLAPKTARTPEYAF<br>GLNYGYHLNAGKFVELLKRHCVDKLGVDYQLGHVDQILSDENGDISALLLTA<br>GDKISGDLFVDCTGFSALLIGQHYQVFPVSQRDCLFNNTALAVQADHADED<br>TPIASCTKSTAQSSGWWDIALPTRRGIGHVFSSQHISVEKADELQRYLAA<br>DPALAKKQHSRKITFQPGHREHFWHKNCVAVGVSAGFVEPLEASALVIE<br>KSAEFVSNLPPQDRGAMTVVAKRFNEIISKYWVDIIDFLKLHYVLTERTDSY<br>WRDHVRPQSIPDSLQDSLELWRSQVPWVSDGNNRAELFSAASVQYILYGM<br>GFATQINSSRYRDWDKDALADRLMRDNRGKTEALMASQPTNRDLLNLVR<br>RTS            |
| 24 | MNHKINRVVIVGGGTAGWLSAGIIAAEHCIKTSSPENPFQLTLVESPDIAI<br>GVGEGTWPSMRSTLQKMGISETDFFRECSASFQKQTLFKGWRTGADDIYT<br>HPFTPPQGYTEVNLAPHWQTAREQINFAQAVSPQSALFTDKLAPKQISTPE<br>YAFNVNYGYHLDAAKFAEFLRKHCVEKLGVTTHIKANVTGINSADNGDIASAT<br>DSHGTEGELFIDCSGRALLIGEHEFGIPVCSKSDILFNNTALAAQIPYTHEND<br>PIESCTLSTAQSAGWIWEIGLPTRRGIGHVYSSDHNTTEERASEELLAYIASTV<br>SDQAAAAATLRKVKFSPGHRAKFWHKNCVAIGMSAGFIEPLEASALVIV<br>ELSAAMIAEQLPANRQIMDLVAKRFNDKFLYRWDRIIEFKLHYILTQRRDTE<br>YWRDNCESSVPEQLVDLLALWRHQSPWHRDNNVDDMFPSASFQYVIY<br>GMDFETMPSQTQRRELAERQRAGALFQENATRTQQLQTSLPSNRDLINKI<br>YTFGFQKI |
| 25 | MTDKNITKVVVGGGTAGWMAAASLSKLGIPNIRVCVVESEIGTVGVGEA<br>TIPTMMLHQLLKIDQPEFMAAVQGTFLKGINFENWNLGDSYMHAFGRTG<br>QDCWAGGFQHFWRTRGKELGISEGYGRYSASYVAAKAGKFAVLDPHLSLSYA<br>FHMNATLYAKFLRNMAEKHGCERVEGKITQVNTHSDSGYIDSITLESQKIE<br>GDLFVDCSGFRGLLIDETLQTEYEDWSNWLPCDSAVAVQTESVGEPIPYTR<br>AIARDAGWQWRIPLQSRVGNMVFCSKYLSDDAEVDSLLKNVEGTPLTKP<br>RIIKFRTGQRKQHWKNCIALGLASGFVEPLESTSIHLIQRGIIRLLQMFP<br>HQGICQPDVVEFNQMSDEFVVRDFIVMHYHLTERDDTPFWRHRCQSMPI<br>PDGLRHRDLDFKQTGRVFEAGDVFAENNWWVQVMLGQGLLPEQYHPIVDS<br>MSEAELDNFLKGLAGNIDHLVNQLPSHQSFVSNYCPADSV                                 |
| 26 | MEHQKIKHVVIAGGGTAGWMAAAAVAKLLGKTVKVSLVESEEIGTVGVGEA<br>TIPTLLTHELLKIKEQDFISAVGGTFLKGISFENWHDVKGDIHSFGYTGKD<br>CWAAGFQHFWLKGGKELGISKDFGEYCNEWAAAKQNRFAVLPNQNLNYAY<br>HFDSSRYATFLRKIAEEHGAVRIEGKIEAVQQHEQTGFITGLRLESQQVDG<br>DFFVDCTGFRGLLIEQTLHAGYDDWQHWLPCDSALAVQTEENVQPIPYTRS<br>IAHEAGWQWRIPLQHRGTGNLVYCSKFWSRDEAEAKLRGNLEGELVTDPR<br>PIKFQTGTRRRHWVKNCAVGLSSGFMEPLESTSIHLIQRSIVRFMQMF<br>PSDGVRQPDIEEFNNQMKFEIENIRDFILHYHVTNRDTDFWRHRCRTMEIPE<br>SLQHRIDLKFKETGRVFKVPTLFGENSWTQVMLGQGLSPEQYHPIVNMMD<br>EQELRDFLGGIHGSVERLVSQLEPHQRFDHYCREA                                  |
| 27 | MGTTEHVIVGGGTAGWLTAAARLGAMANRQFDITLVESPSVPTVGVGEGT<br>WPSMKATLQAIGLSERVLISECDASLKQGLTFHGWRTGAADDSYLHPFSLP                                                                                                                                                                                                                                                                                                                                                                                                                                                                      |

|    |                                                                                                                                                                                                                                                                                                                                                                                                                                                                                                                                                                                                   |
|----|---------------------------------------------------------------------------------------------------------------------------------------------------------------------------------------------------------------------------------------------------------------------------------------------------------------------------------------------------------------------------------------------------------------------------------------------------------------------------------------------------------------------------------------------------------------------------------------------------|
|    | PEYASKNIAEYWRRDGLRYPFHEVVTPQALIATTHKAPKTADTPDYAFALNY<br>GYHVDVAVKFAALLRQHSVSRFGVRRHIEGHVAGVSSDSAGFLTSLELEGGDR<br>LSGDFVDCSGQKALLIGDHFVKVPFESARHVLNPNRAVVAQVPYNPNDEI<br>HSCTQSSAQDCGWIWDIGLQSRRGVGYVHNADFISEAEATQTLRNYAEQS<br>VGAKVAQDLACRTLNFEPGYRGTPTWTHNCVAVGLSAGFIEPLEASALAM<br>IEQAASFLVESFPVNRDLMGPASRAFNRKMESNWASIQEFLKLHYVLSDRD<br>DTPYWQQACDETSISEGLSDKLALWQIRAPWHPDTPRIDELFPAASYQYVW<br>LGMNGHLNGVIGSAGQGGKDHASSADLDPILFKVRERALQLSRAMPGNR<br>QLLNALRMNNPSATVTA                                                                                                                           |
| 28 | MRVVIAGGGTAGWMAAAALAKYFGGTVAITLVESEIGTVGVGEATIPQIRL<br>FNGLGIDEREFLRETNGTIKLGIEFVDWRRRGERYFHGFGEVGRAIGLVPF<br>HHYWLRYAGEGGELPLEEFSPNAVAAREGRFGPGAGVAGARLPASAYHFD<br>ATLYARFLRRYAEARGVTRREGKVLSCSTRNGGTGFIEALEMEKGDRIAGDL<br>FIDCTGFRALLIGETLGIDYEDWSHWLPCDRAFALPSEGRGRLDPFTRSTAR<br>GAGWQWEIPLQHRTGNHGVFASAFTDEQAALATLTGTLPGKALAEPRLLRF<br>ATGKRRRMWHGNCVALGLSSGFLEPLESTSIHLIQAGIARLLALFPDRSCD<br>PALVEEFNRQLDFEYEAIRDFLILHYHATDREDTEFWRYCRTMAIPESLSDK<br>MELFRASGRIVRFNTELFDVPSWLQVMWGQGLRPRTYHPMVDAAPDADLT<br>RYIAMNAGEVRQQVDTLDLHETYIARVARAGRDTAAPAGGG                                         |
| 29 | MRVVILGGGTAGWMAAAALSRYFGDRLSVTLVESDAIGTVGVGEATIPQLR<br>LFHEGLGIDEADFLRATGGTIKLGIEFIGWQREGTRYFHGFQDVGRKIALAPF<br>HQYWLRYNAEGGELPLEAFSVNAEAARRGLYGVPRGAAAARLPASAYHFD<br>ATRYAAFLRRFAEAHGVVRREGRVRAPELTASGDIAALVLESGARLSGDLFL<br>DCSGFRALLIEEALGAGWEDWSHWLPCDRAL<br>AVASAGDGRLDPFTRASARAAGWQWRIPLQHRTGNHGVYASAFTTDDAA<br>HDALMTTLPGEAQGESRPLRFTTGRRRAFWRRCIALGLASGFLEPLESTSI<br>YLVQSGIARLLALFPPPGGDATALRAQYNRQMAFDALTRDFLILHYHLTER<br>PGALWEHCRTMALPDSLAEKIALFAERGEIVRFNGELFDVPSWLQVMWGQ<br>GLRPARHHPLVDAARPADLARYIDDTARDVAARLAPLDSHAAFIARRAAAPA<br>PAL                                             |
| 30 | MTGPARHIVIVGGGTAGWLAALILARRDDLRTVVESRIPTIGVGEGTTAVF<br>RQMLQHLGLDERAFLAATGATIKYGIRHRDWRRVGHSYDGPIDDTAQVAGP<br>GLDLYAVASGRPVAEVHLFGTLMDRRRAPVAEVGGREVPAGPFHWAYHFD<br>QARAGAWLKRQATGVTVVDDVAGLERDGEEDITALRLESGARLEGDLFI<br>DCTGFRRALIGPMGAEWVSYGDVLPVNRAMPFWIDLQEGEEIDPFTLAHAQ<br>GAGWMWKIPTTERTYGCYVYSDAHTTPDAAQAEIEAALGRAIEPRNDIRIDA<br>GRLREAWIGNCVAIGLASSFLEPLEATSIHGTVQMLMWDLSLLAAPDGAARY<br>NAAVARQVDDFRDFIRLHYVSERRDTAFWRDVAASHPPEVRRARLDLWRHR<br>LPERRDFAPVPLDLPHVQEQLYTPVLDGLGLLDRASARAALADHPPHRRARL<br>RKTHEQLTKDHRAAGRCRPHRAWLSSSLREEIPA                                                 |
| 31 | MGQPLSSITIVGGGTAGWLAAYLRRACAERIRITLIESPNIPTVGVGEATVP<br>QMPFTLRQIGLDERTFFRRCDATFKTGVMFRNWNTDRKGLVSYLNPFSN<br>APSLDGVSIGNHFHAFGAGKRDYVSCYSPYAHMAKAFKGFPSFKDPKADP<br>MPKPAYAYHLNAVAFKLLAEVGTERTGIEHVLDDVDDVELDERGYVAALQL<br>RERGRHPVELVIDCTGFRGRIIREALDEPFEDYSDYLGNDRAMALQIPHTNP<br>EKLPPFTSSTALGAGWSWSVPLFNRVGTGYVFSSAHRDDEARDEFHLAHL<br>GAAAPPGESEPRVIPMRIGRSRAWVKNCIAMGLSGGFIEPLESTAIHMIDQSI<br>RMLLFNMPSTDYEAPVRRRFNRLVDDLYGEVRDFICLHYRMGNREDSAYW<br>IDARTELKITDRLAENLELWQYQLPTQHDLESAQLFTHDQYQTVLFGKRCYE<br>NGYGAERLNTPREVRAGSWKAYLRDADIRFAKIVDYKGDHHRLLMALRGEL<br>EPGAARKTPAVVAARTGSCLKETPVLF |
| 32 | MRDMLRRFGLSERGVLAACDASFKHGIRFDDWSGPGSRCLHPFHRHALPR<br>DIAARWLASSGEPFAAIAASAQAALIAHERAPRPAGAPEFTGPVPYAYHLDA<br>EKFAEYLAGELTSRGVTRQSAHVTGVLREGETVTALRTEDGAPLSADLWVD<br>CTGFAGLLLPEEGRDWVSYADRLLCDRAVTRMVPEDDPAYTPAPFTRARA<br>LEAGWCWDIGLRHRRGRGYVYSSAHLSDDEAEALRAEEGQHSALPARV                                                                                                                                                                                                                                                                                                                       |

|    |                                                                                                                                                                                                                                                                                                                                                                                                                                                                                                                                                                                  |
|----|----------------------------------------------------------------------------------------------------------------------------------------------------------------------------------------------------------------------------------------------------------------------------------------------------------------------------------------------------------------------------------------------------------------------------------------------------------------------------------------------------------------------------------------------------------------------------------|
|    | IHFTPGRRAAPWQGNVVALGLAAGFLEPLESTGLFLADFAARALVEMFPAA<br>PGLPMQPLARRYNALLAEMHDDLADFLALHYAVAQRRDITTFWRDAKA<br>ALRSERLRELLELWQLRPPSFADFSYRYSFPTSHTAWEFILLGMGWRPATAP<br>AGTTPCAAPAEALTRQMLDALPDHGTLRLHLAQACR                                                                                                                                                                                                                                                                                                                                                                          |
| 33 | MNNNIKKIVIVGGGTAGWMAAASLAKYVNNNSAEICLISSDIATVGVGEATIP<br>NIVQFNRLGIDETAFIKATQATFKLGIQFENWHPQNKQFFHFPFADYGLKIDQ<br>VDFHHYLYRAQQTECSSQLADFSFACQLAKQYKFAQPHANPSTPLADYAY<br>AYHFDAGLYGQFLKHSINAGVNHGHTIEQVNLHPDTGFINNVALTDGQIVE<br>GEFFIDCSGFEGLLIEKALHTGYEDWSHWLFCDSALAVQTTRVNPPEPFTR<br>SIAQSAGWQWHIPLQHRSGNGYIYSSRFESDEQAKALLQTNINGEPLGEIRK<br>ITFKPGRRKQIWHKNCFALGLASGFLEPLESTSISLVQTAIAKLLTFPDCSFN<br>QADINEVNRLHNLELENIRDFLILHYKLSARCDTPFWQACQNMAQQSHCHN<br>PHNYTRSRSRCSGVGRAPSPQSHSPSMLVRIQVLAFAFEHIERRRVYALYLP<br>RI                                                         |
| 34 | MDIKKVAIILGGGTAGWLTANHLGKALIGQGISITVIESPDITIGVGEATVPM<br>RETLKYFGISESQFIKECDATFKQSIKFNWLDKTAHGEENFYHHLDFDFP<br>NNRDLTPFWLRTQHKSFAQTVSFQANVCEAKKAPKKISTPEYVGETTYAYH<br>LNAKKFAELLQNHAVNKFSVAHQVSTVIDATVNNTDIELIVTDTHGEQVDFY<br>VDCSGFNCYLLGKKNIPFVDMSHKLPIDKAITAQIPTEDDAEIPPYTIATAHE<br>AGWIWDIALKNRRGTGFVYSSNYLSDEEAKQKFERYLQGSLEGIVSRVIM<br>KIGYREQFWQGNCAIGLSQGFVEPLEATAILVTDFCARHLAERFPRSKSEL<br>PACQSRFNRNKYAWDRVIDFIQLHYLSDRQDSAFWLDWKNVDRLSDEL<br>KQKLAIWQNNPPLSTDFFSKFEVFDVENYLVLYGMHYLTKPSYIDAKSFEQ<br>DQILAQQVE<br>DHSQKLIASLPSHRELIDKLARDFDFSKL                        |
| 35 | MSHRVNQVVIIGGGTAGWLTAAVLSSQLQSTNKEAVQVTLVESPNIPILGVG<br>EGTWPNLRLATLQIGVSEAEFMKGCDFATFKQGFALFCNWMKSVNEQTHQY<br>YHPLNTVFHSSYEFSLAPYWLLGHSESRYSRYDHAVATQSLVCEAGLGPKEKT<br>TPEYQAVQEYSYHLNANKFARFLTCHKCTEKLGVKYIQANVLKANRDGDDYV<br>TSVTTDSEQYDAICGDLFVDCSGTTPVLFQTYHIPWVDISDVILNDTAIAMQ<br>VPYADPERDIASHTIMTAQDNGWIWDIGLYNRRGVGHVFSKHTDIKTAEK<br>QLRDYIGQEAEGLTARVIPLKLGyreKFWHKNCVAIGMSAGFVEPLEASA<br>IYLYDAAAKMLADQFPRTRESMQYVEEFNRSFNMRMIRTIDFIKLHYCISDR<br>DDSAYWRDNCSNKTIPKALQQRLLHWKEHPPTKYDFDNAWEPFNLDYLY<br>VLYGMKYQTSLAHNQDGFYSDKAKAKFRDVSMMADKLVTHLPKHRDLLKK<br>VYQFGFTKI |
| 36 | MTPTKISNVVIVGGGTSGWITAALLVKVLGRVINITLVESDEIGTIGVGEATIPP<br>IVQLNNALGISEKTFLAHTKGTFLKLGIEFNDWGQLGDSYMHAFGGIGKSLPF<br>CDFHHLWLQSKQQGGNSDFWDFSLNYQAAMAGKFGPSQKIASTNIQGLE<br>AYHFDAGLYAGLLSEFSQGLGVKRLEGKVTEVVVNQNNQNDVSHLCLANGE<br>HLYGDLFIDCTGLKALLIEQTLNTGFEDYSHWLPCDRAVAVPCEKVEPIVYPT<br>RSTAHSCGWQWRIPLQHRGTGNGLVYSSKYLSDAAKAQLLNSLDGKPLGE<br>PKIIAFKTGRRRKQWHKNVVAIGLSNGFFPELESTNIHLIQTAAATRLIKFFPHF<br>GIKDAEVSEFNQAQVEAEQMRDFIILHYKVNQKVDSFPWQACQRMEIPHT<br>LAQKIALFAQSGKVFREQDELFTIAWQQVMLGQNLVPADIHPIATMLSPLQ<br>LSELMENLKTLDHNVAGIVSHSDFLAQIAH                            |
| 37 | MNHKSRIVIVGGGTAGWLSAAKLAKELAAANQPNGVQVTLLESDDIPTVGVG<br>EGTWPTIRKTLASIGIDEAEFIKETDASFQATQFVNWKSDDIPSTNNTYYHLF<br>SSVSDSAQFNLPYWLLGDKHTSYAQAVSAQDILCDKGLAPKLITNKPYE<br>QNYAYHLDAGKFATLLKRHCIEKLGVKHLIGNVVQVNTDEEGAIASLVTD<br>GMLAADLYVDCTGFKSLLIGQALGVKFNISADTLFVDNAIAIQMPYENDEADI<br>ASATLSTAQQAGWIWDIGLQSRRTGHVYSSEFISHDEAEHTLRQYLGPKA<br>TDLPAKHIMNCGYREKFWHKNCVAIGLSAAFVEPLEASAIFLIEASANMVA<br>ELFPINKALMQASAQTFNDSFNWRKTIDFIKLHYVLSNRSAPFWQANKRP<br>ESIPSSLSEMLNQQHRPISKYDFAHVFEPPQESYQYVLYGMGYHPDLA<br>MSQSRYANLDTAENLFGQVSQMRSNFEKHLTTNRALLNKVKKYGFQKL                     |

|    |                                                                                                                                                                                                                                                                                                                                                                                                                                                                                                                                                                                                                         |
|----|-------------------------------------------------------------------------------------------------------------------------------------------------------------------------------------------------------------------------------------------------------------------------------------------------------------------------------------------------------------------------------------------------------------------------------------------------------------------------------------------------------------------------------------------------------------------------------------------------------------------------|
| 38 | MSDSKAPNVVVLGGGSAGWITACLLHRQWSEKGGSVTVVESPEIGIIGVGE<br>GSTPQLKAFFDQLGIAESEWMPACNATYKLGIRFNGWSERAGFESYYHPFP<br>GPIDLHSEPGFIGNCMLARHQIDVAAHPDDWFLATHLSEAGKSPIAAENFPF<br>APSYGYHFDAYALGAFLRDWAVKRGVVHRPLKVTAVERRADDGDIAALLCEG<br>GERIEGDLFVDCSGFRAMLAEQELGATFLPFAENLFNDSAVVLPTGHGAPF<br>KPQTEATAMRAGWRWSIPLTTRVGNNGYVYSSKYISNEDAEAEALRGALGLA<br>GDGPEARFLKMKVGRLENSWTRNCLAVGLSQGFLEPLEATALHIVIVTAL<br>EFAQAYEQGGYGPQHRDAFNASIAARYEGIRDYIVAHYRVNQRSDTQYWR<br>DNAANDRLSNGLKTMMAWFRHQDIHAANDEAYGGKRYANASWHCLFA<br>GYGTFPPQERMEAVPEGIRPADPAEARAMLEACAQNFPSYDPIAS                                                               |
| 39 | MNPTDLPPIVIAGGGTAGWMAAATLGRFAGRKVVLLVESEAIGTVGVGEATIP<br>QIRLFNAALGLDEAEFLRETQGTFLAIEFAGWGGEGERYLHAFGTVGHGA<br>GVLFPQHYWLRARQAGKAGPLSDYALNDVASRAGKMQMWQAEPGKPPV<br>DMPWAYHFDAGLYAAYLRRYAEAHGVERVEGTIASVERDGESGDIAALVLD<br>GERRIEGGVFVDCTGFRSLLLGGALGVEFMDWTQWLPCDRAVAVPCETKG<br>EFTPYTRSTARKAGWQWRIPLQHRIGNGHVFCSDFMGEDEATKLLANLD<br>GAPTADPRVLKFTTGMRQQWVSHNCMALGLAGGFMEPLESTSIHLIQASIA<br>RLLQMLPGAEVAPAMRAEFNRQAEFEWTRIRDFLILHYWANGREGPEFWD<br>RCRAMDVPDTLSTKVETFRASGFVHREHEELFTEPGWLQVLIGQGVVPEN<br>YNPIADAMPEVELTAMLARIAETNQRLVAAMPDHAPFLRAHIDPRKQAPTQQ<br>RIPA                                                    |
| 40 | MHSMAEPVTSITVVGGGTAGWLAATYLRSKCAPKIAITLIESPNVPTVGVGE<br>ATVPHMPVTLREMGIDDKEFFRRCNTSFKMGVMFRGWNVDHKGRPFYDM<br>NPFAPPPKIDGVEAGHYFQAFGAGRRDYIQSFSPLMDLLDAGKCPKLSFNAK<br>NDPMPRAGYAYHLDAGAFKMLAEVGVARGVEHVLDDVDGVELDDTGHV<br>AALNLRALGRRPVQLVIDCTGFKGLVIREALGEPFENYSYLANDRAMALPI<br>PHADPEVLPAATSSTALGAGWSWSVPLYHRIGTGYVYSSAHRDDAARD<br>FMAHLGDRAPKGAEPVPMRIGRMRRRAWVKNCVALGLSGGFIEPLESTAI<br>HMIDMIRWLLQYFPSRDYEESTRAAYNRCADEMYNEVRDFICLHYRLGNR<br>TDTDYWC DARGLKITDRLEGWLDLWQRQLPVEMDIGRANLFDHNTFQAVL<br>LGKRVYENGWGAARLNRSFALSEKRWKAFLRDSAARNMAVVKAKADHRR<br>ALRVLRGEATDGAVTRQSLGAVADEAVLF                               |
| 41 | MNNRLRKITIVGGGTAGWMTALILETELSRTSAPKDRPKICLIESPNIATVGV<br>GEATVPRMPKTLRQAGISERAFFRETNASFKLGVKFCNWNKDAKGNRIDYV<br>NPFAGHQLLDGLEPAEYFLRFGNGDRDYTQSIAPHDDLGRKCKGARPLGQ<br>PEFEQRFQYAYHLDVAVKFAFMLTKVCTKHGVEHIQDEVTSVELDEQGNVS<br>HLMLEQRGRHDIEMVIDCTGFRGLIINQALGEPFMDYSDYLPNDRAMALQID<br>HPDPEKIESLTRSTALGAGWTWRVPLYNRVGTGYVFSSAHRDDQAADY<br>LEWLGDGSGKATPRIIPMRIGRVRNAWVKNCVAIGLAGGFIEPLESTAIHMID<br>HAVRWLTEHMPTRDIAPSLRTRYNRQMDKLYDEVLEFICLHYRLGNRTDDQ<br>YWIDARTEMKIPDRLAENLELWQHRLPMSHDIEFATLFDYRVYQTVLLGKQV<br>YDTGYGPGIRDRLRPLKKPIWFQWWKGAADLAQILKAMPDHKTLLRDIRG<br>ELDQPGFGMAAAMKPTVPMPGAAPVPWAIQNMPSFSEIESGQKDLQLF |
| 42 | MNNTIKKVVIAGGGTAGWMAAASLSKLGKLEITLIESDEIPTVGVGEATIPP<br>LILLHQLLDMDEKEFMKAVHGTFLKGLICFENWRDVNEDIHSFGYTGKDCW<br>AANFLHFWLKGKLEKISKDYGVYCTELIAAQNKFAVLQSGALNYAYHIDAG<br>RYAALLRKIAEKHGTTREQGRIDSVAATNEHTGYIESVTLASGQRIEGDLFIDC<br>TGFRGLLIEQTLHTGYDDWSHWLPCDSAVAVQTRSVGPPIPYTRSIARDAG<br>WQWRIPLQSRVGNGLVFCSTRYLSDDAEIQITLNNVEGETITDPRVIKFRGTGQ<br>RRKHWNKNCVAMGLASGFIEPLESTSIHLIQKAVTRLIQNFPFEGIHESI<br>KEFNTQMDADTENIRDFIILHYHVTNREDTRFWRHCKNMSIPDSLQHRIDLF<br>KETGRVFKSPNDLFFVENSWIQVMLGQGLMPKQYHTIVDEMSDEELRKFMQ<br>GAELSVQRTVSQPLSHQAFIDHYCKADLGTAGEHAMPLNPQSGVRAAS                                                  |
